# Supplementary material for: Multiple Li+- and Mg2+-decorated PAHs: potential systems for reversible hydrogen storage
Source: Royal Society of Chemistry journal article supplement (doi:10.1039/c6ra25746a), 2017-01-01
Supplement: c6ra25746a1.pdf [file c6ra25746a1.pdf]

## Multiple Li<sup>+</sup> and Mg<sup>2+</sup> Decorated PAHs: Potential Systems for Reversible Hydrogen Storage

Avik Ghosh, Tanay Debnath, Tamalika Ash, Abhijit K. Das\*

### Supporting Information

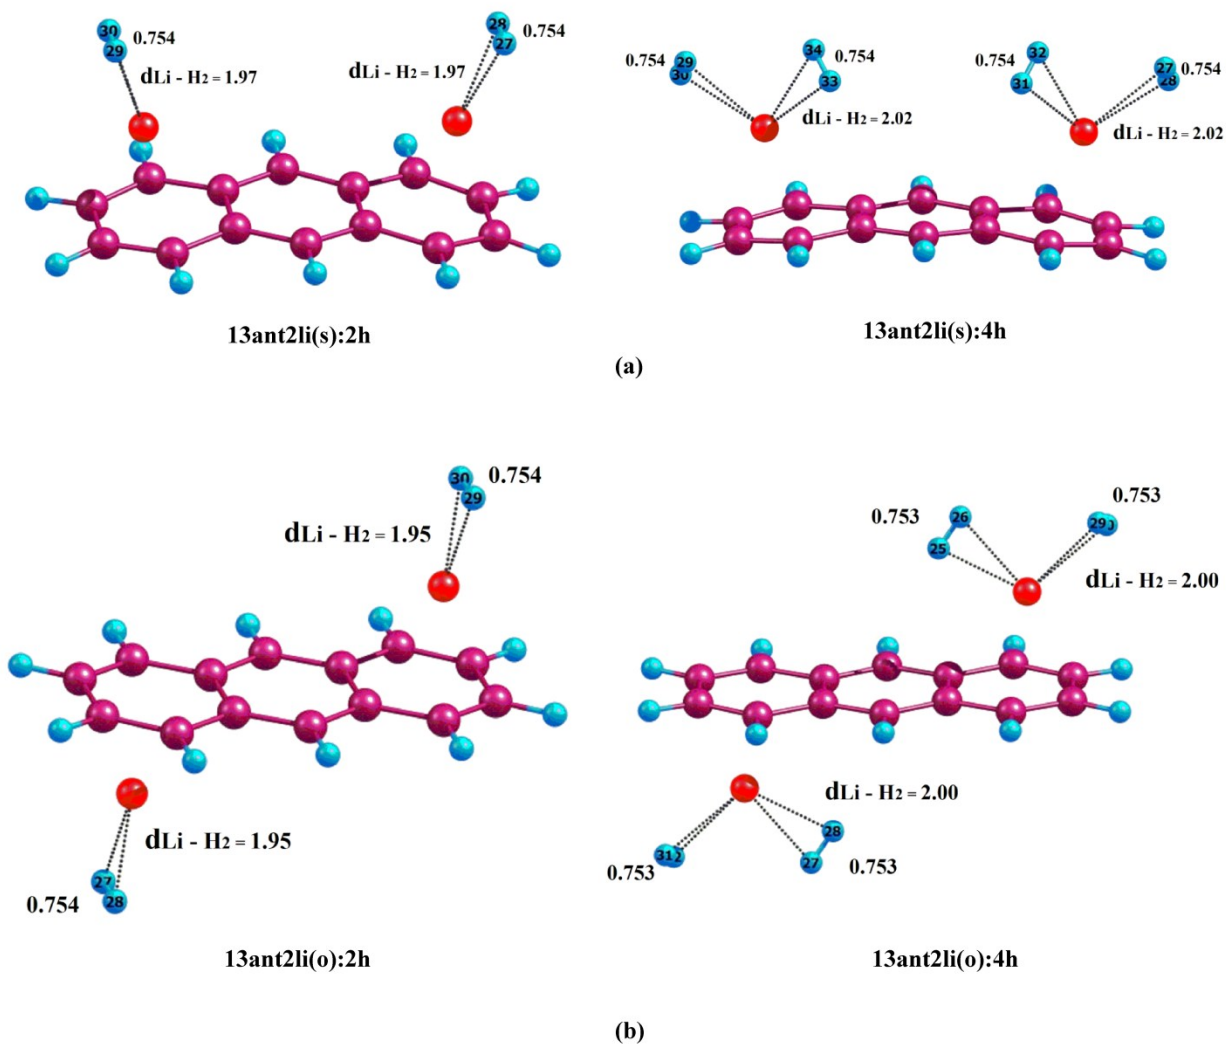

Fig. S1  
 13ant2r  
 conjunc  
 Li<sup>+</sup>/Mg:

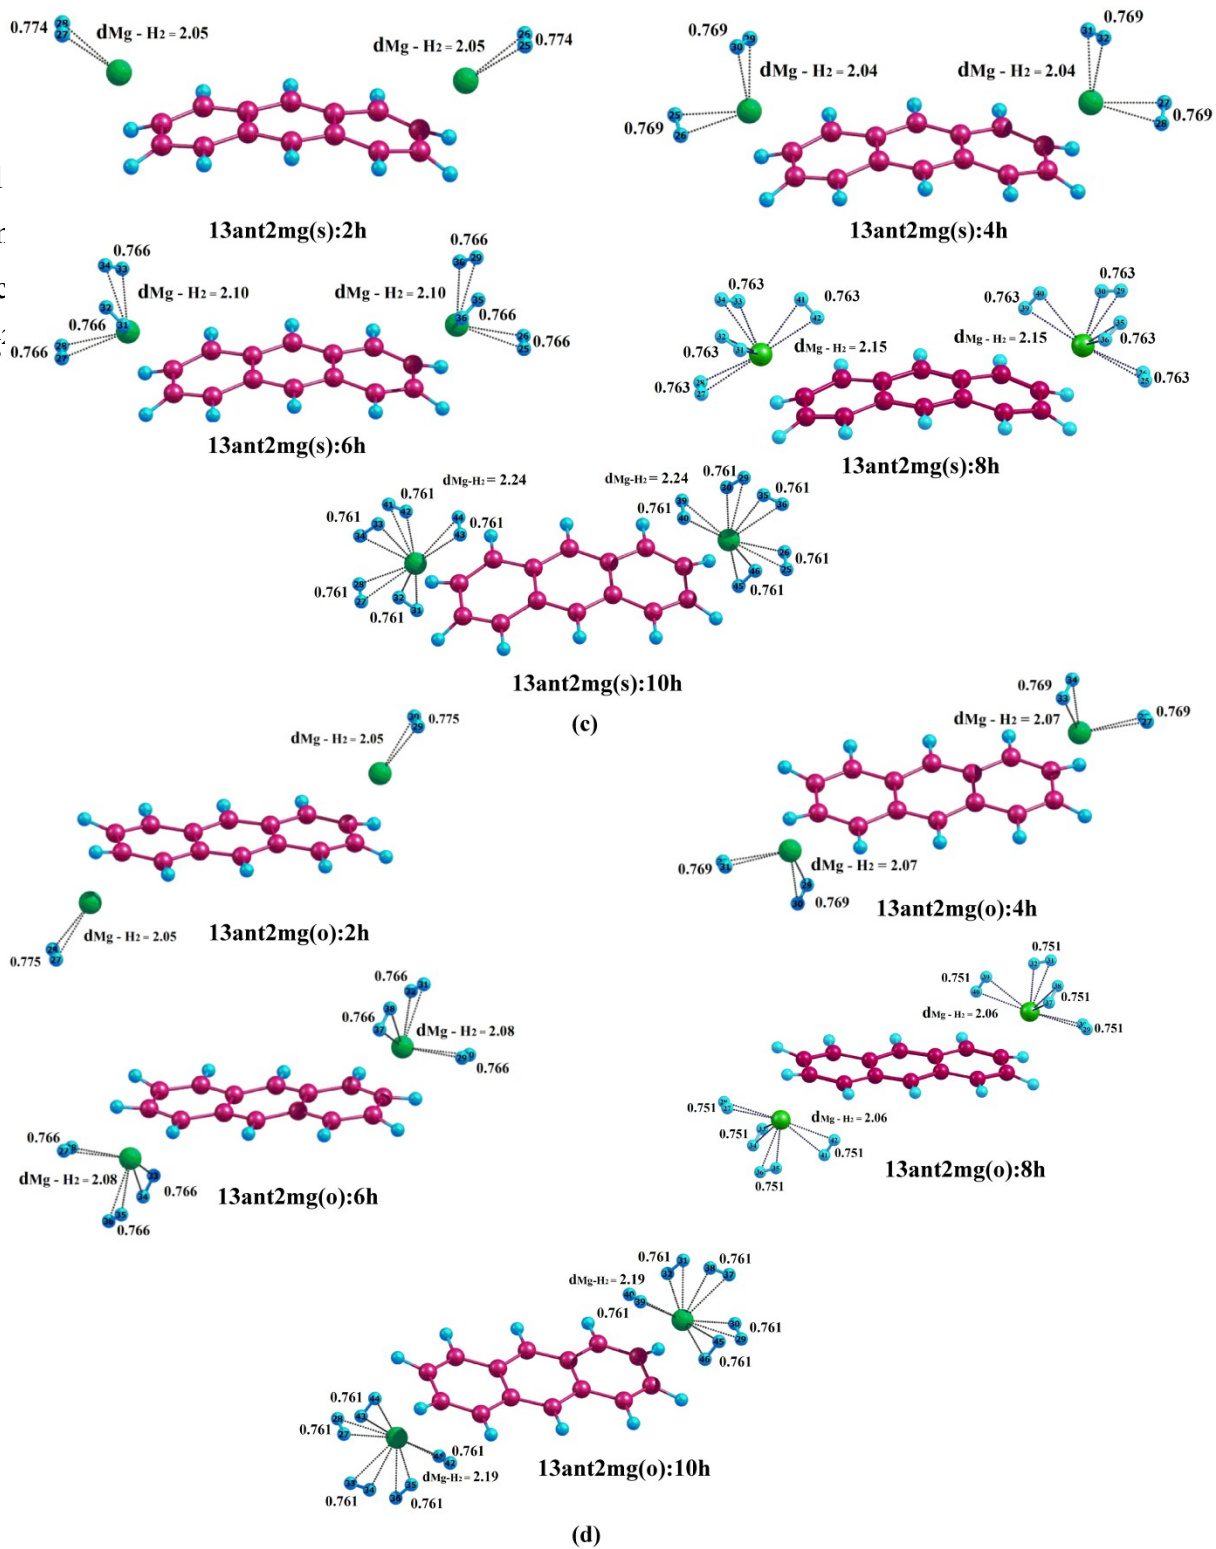

2,4; (c)  
 level in  
 between

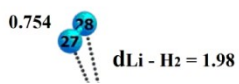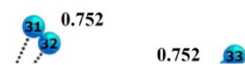

Fig. S2. Optimized geometries of (a) 13phen2li(s):nH<sub>2</sub>, for n = 2,4; (b) 13phen2li(o):nH<sub>2</sub>, for n = 2,4 at CAM-B3LYP level in conjunction with 6-311+G(d,p) basis set. dLi-H<sub>2</sub> represents the average bond length between Li<sup>+</sup> and H<sub>2</sub> molecules. All the bond lengths are given in angstrom (Å).

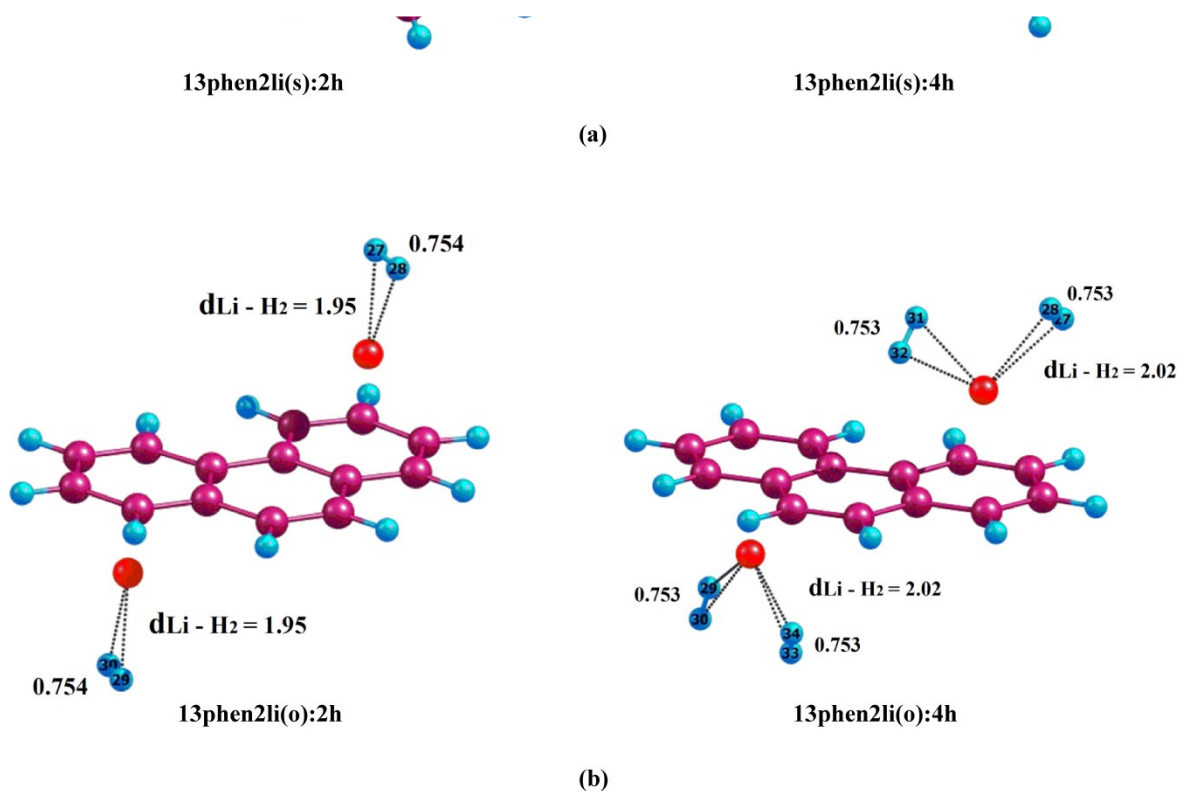

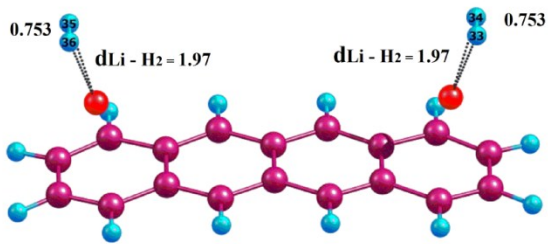

14napc2li(s):2h

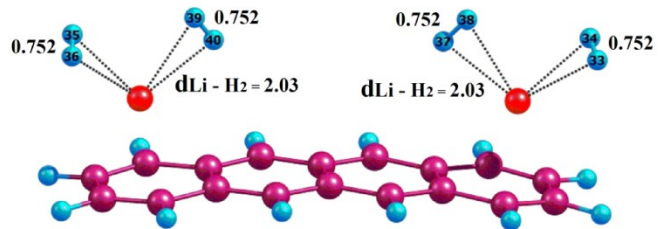

14napc2li(s):4h

(a)

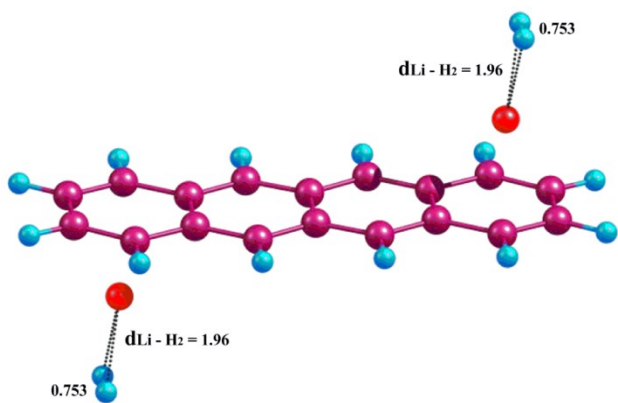

14napc2li(o):2h

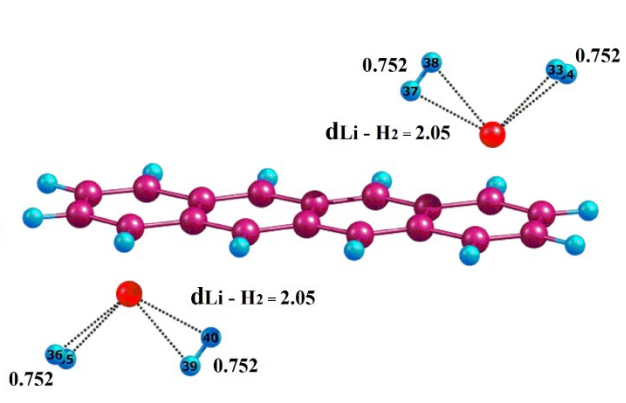

14napc2li(o):4h

(b)

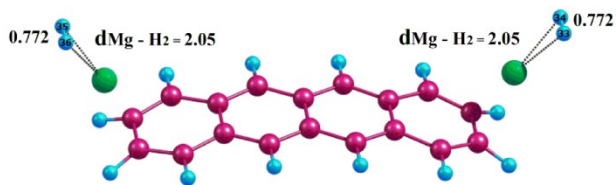

14napc2mg(s):2h

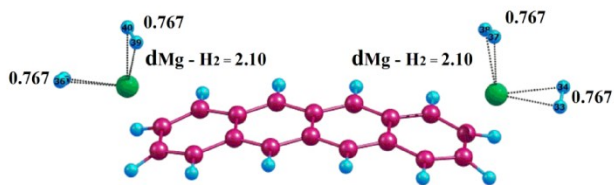

14napc2mg(s):4h

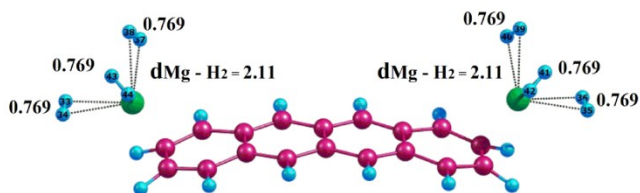

14napc2mg(s):6h

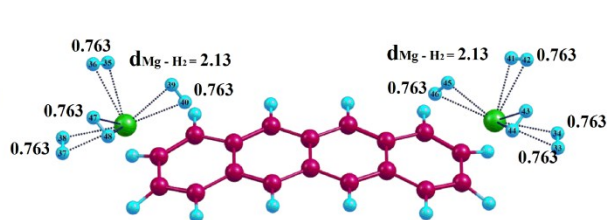

14napc2mg(s):6h

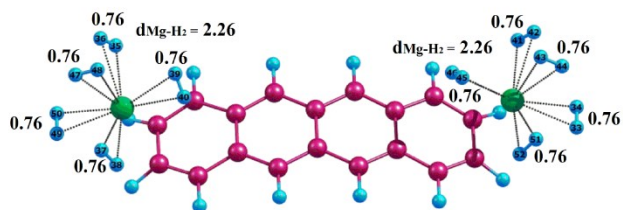

14napc2mg(s):10h

(c)

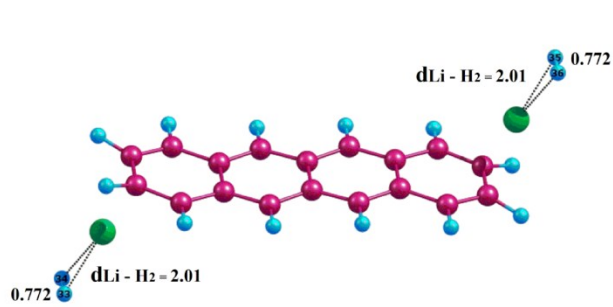

**14nape2mg(o):2h**

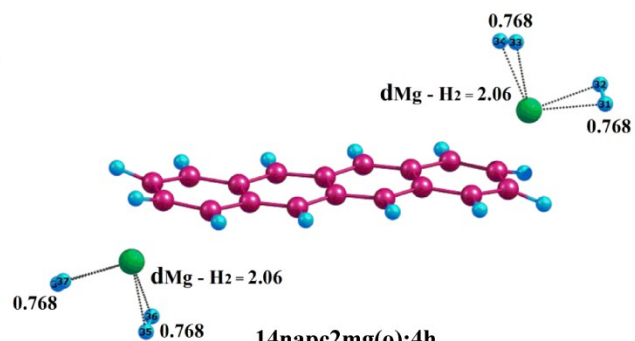

**14nape2mg(o):4h**

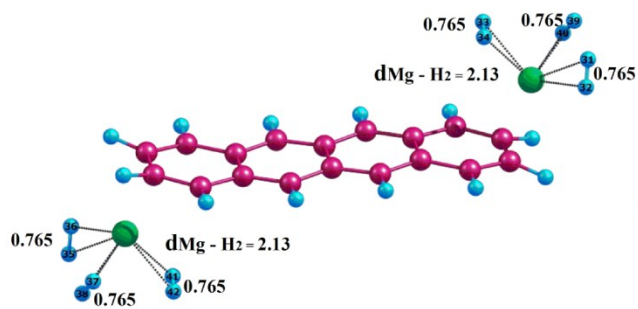

**14nape2mg(o):6h**

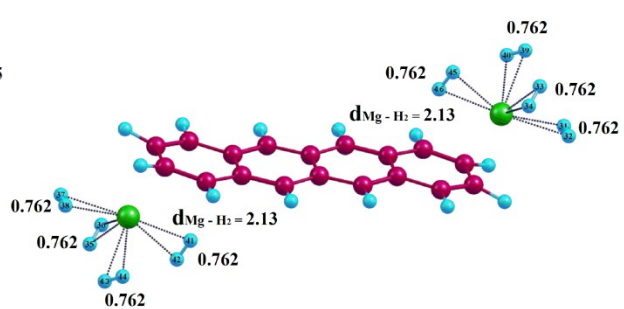

**14nape2mg(o):8h**

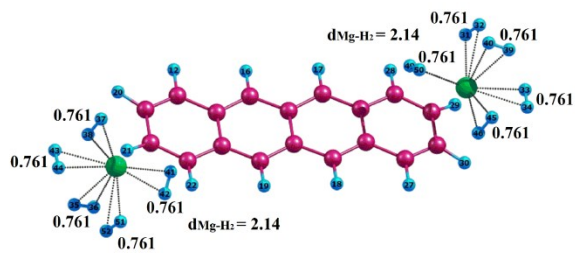

**14nape2mg(o):8h**

(d)

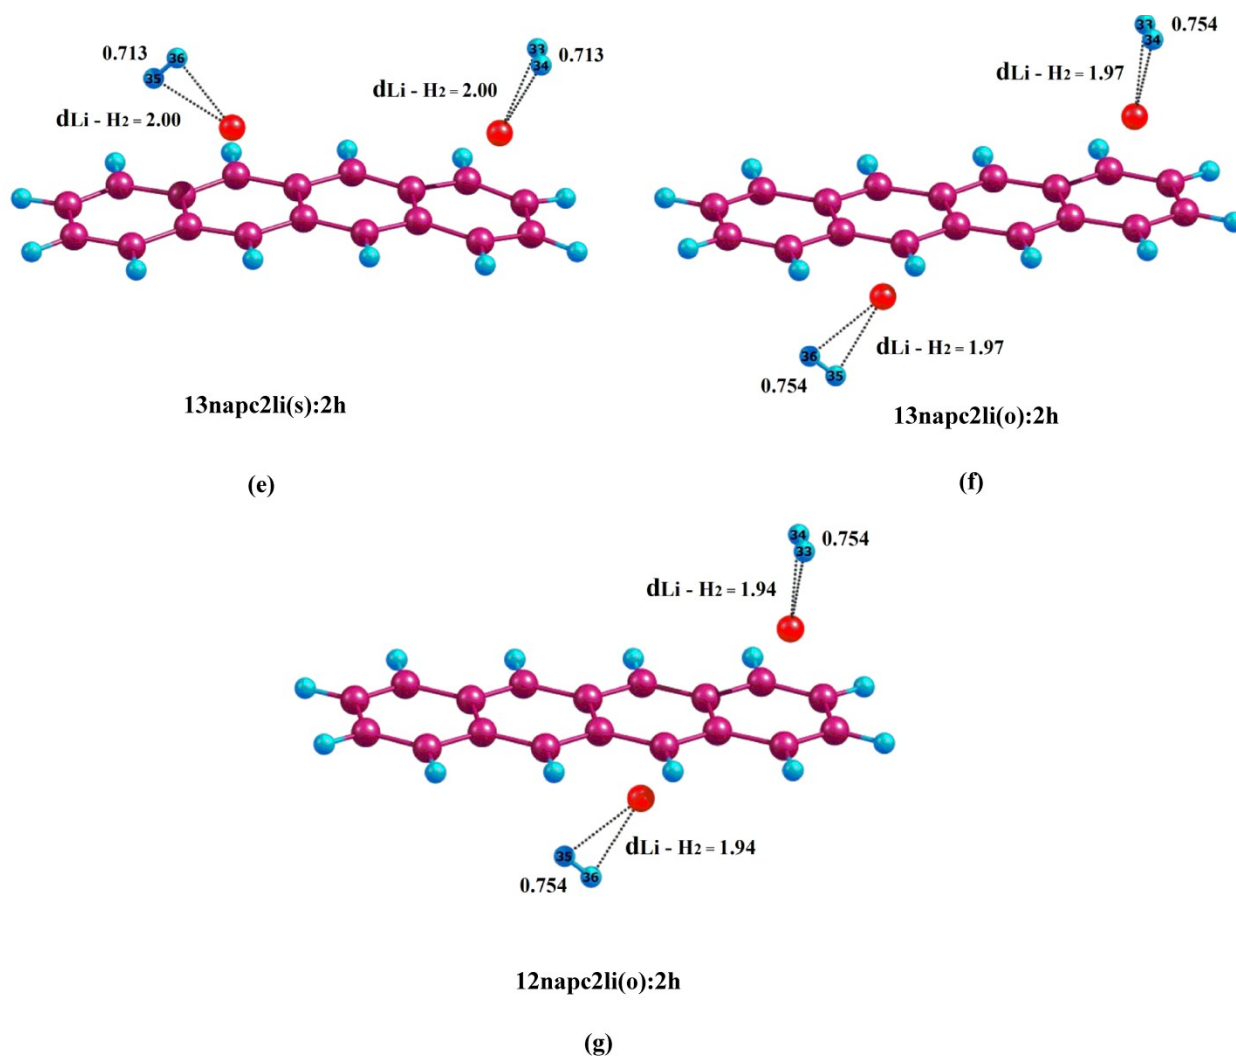

Fig. S3. Optimized geometries of (a) 14nadc2li(s):nH<sub>2</sub>, for n = 2,4; (b) 14nadc2li(o):nH<sub>2</sub>, for n = 2,4; (c) 14nadc2mg(s):nH<sub>2</sub>, for n = 2,4,6,8,10; (d) 14nadc2mg(o):nH<sub>2</sub>, for n = 2,4,6,8,10; (e) 13nadc2li(s):nH<sub>2</sub>, for n = 2; (f) 13nadc2li(o):nH<sub>2</sub>, for n = 2; (g) 12nadc2li(o):nH<sub>2</sub>, for n = 2 at CAM-B3LYP level in conjunction with 6-311+G(d,p) basis set. dLi-H<sub>2</sub>/dMg-H<sub>2</sub> represents the average bond length between Li<sup>+</sup>/Mg<sup>2+</sup> and H<sub>2</sub> molecules. All the bond lengths are given in angstrom (Å).



Table S1 : BSSE corrected Successive H<sub>2</sub> binding energy ( $\Delta BE(n)$ ) (kJ mol<sup>-1</sup>) of Li<sup>+</sup>/Mg<sup>2+</sup>- decorated anthracene, phenanthrene and naphthacene at CAM-B3LYP level.

| <b>System</b>     | $\Delta BE(n)$ | <b>System</b>      | $\Delta BE(n)$ |
|-------------------|----------------|--------------------|----------------|
| 13ant2li(s) : 2h  | -              | 12nape2li(o) : 2h  | -              |
| 13ant2li(s) : 4h  | -20.7          | 12nape2li(o) : 4h  | -25.8          |
| 13ant2li(s) : 6h  | -16.4          | 13nape2li(s) : 2h  | -              |
| 13ant2li(o) : 2h  | -              | 13nape2li(s) : 4h  | 34.7           |
| 13ant2li(o) : 4h  | -22.9          | 13nape2li(o) : 2h  | -              |
| 13ant2li(o) : 6h  | -14.0          | 13nape2li(o) : 4h  | -22.8          |
| 13ant2mg(s) : 2h  | -              | 14nape2li(s) : 2h  | -              |
| 13ant2mg(s) : 4h  | -101.0         | 14nape2li(s) : 4h  | -18.0          |
| 13ant2mg(s) : 6h  | -83.4          | 14nape2li(s) : 6h  | -10.5          |
| 13ant2mg(s) : 8h  | -55.8          | 14nape2li(o) : 2h  | -              |
| 13ant2mg(s) : 10h | -30.4          | 14nape2li(o) : 4h  | -19.3          |
| 13ant2mg(s) : 12h | -15.5          | 14nape2li(o) : 6h  | -10.7          |
| 13ant2mg(o) : 2h  | -              | 14nape2mg(s) : 2h  | -              |
| 13ant2mg(o) : 4h  | -103.2         | 14nape2mg(s) : 4h  | -93.6          |
| 13ant2mg(o) : 6h  | -82.9          | 14nape2mg(s) : 6h  | -73.0          |
| 13ant2mg(o) : 8h  | -58.3          | 14nape2mg(s) : 8h  | -55.1          |
| 13ant2mg(o) : 10h | -31.5          | 14nape2mg(s) : 10h | -22.8          |
| 13ant2mg(o) : 12h | -15.8          | 14nape2mg(s) : 12h | -11.6          |
| 13phen2li(s) : 2h | -              | 14nape2mg(o) : 2h  | -              |
| 13phen2li(s) : 4h | -19.2          | 14nape2mg(o) : 4h  | -94.4          |
| 13phen2li(s) : 6h | -15.8          | 14nape2mg(o) : 6h  | -73.8          |
| 13phen2li(o) : 2h | -              | 14nape2mg(o) : 8h  | -55.2          |
| 13phen2li(o) : 4h | -21.2          | 14nape2mg(o) : 10h | -22.8          |
| 13phen2li(o) : 6h | -12.9          | 14nape2mg(o) : 12h | -11.6          |



Table S2 : AIM analysis of H<sub>2</sub> adsorbed-Li<sup>+</sup>/Mg<sup>2+</sup>-decorated anthracene at CAM-B3LYP method in conjunction with 6-311+G(d,p) basis set.

| System                 | BCP      | $\rho(r)$ | $\nabla^2\rho$ | G     | V      | H     | - G/V |
|------------------------|----------|-----------|----------------|-------|--------|-------|-------|
| <b>13ant2li(s):6h</b>  | Li25-H27 | 0.012     | 0.063          | 0.013 | -0.010 | 0.003 | 1.290 |
|                        | Li25-H31 | 0.012     | 0.061          | 0.012 | -0.010 | 0.003 | 1.282 |
|                        | Li25-H37 | 0.012     | 0.061          | 0.012 | -0.010 | 0.003 | 1.282 |
|                        | Li26-H29 | 0.012     | 0.063          | 0.013 | -0.010 | 0.003 | 1.290 |
|                        | Li26-H33 | 0.012     | 0.061          | 0.012 | -0.010 | 0.003 | 1.282 |
|                        | Li26-H35 | 0.012     | 0.061          | 0.012 | -0.010 | 0.003 | 1.282 |
| <b>13ant2li(o):6h</b>  | Li37-H25 | 0.012     | 0.062          | 0.013 | -0.010 | 0.003 | 1.280 |
|                        | Li37-H31 | 0.011     | 0.058          | 0.012 | -0.009 | 0.003 | 1.282 |
|                        | Li37-H33 | 0.011     | 0.058          | 0.012 | -0.009 | 0.003 | 1.285 |
|                        | Li38-H27 | 0.012     | 0.062          | 0.013 | -0.010 | 0.003 | 1.280 |
|                        | Li38-H29 | 0.011     | 0.058          | 0.012 | -0.009 | 0.003 | 1.285 |
|                        | Li38-H35 | 0.011     | 0.058          | 0.012 | -0.009 | 0.003 | 1.282 |
| <b>13ant2mg(s):12h</b> | Mg37-H25 | 0.015     | 0.065          | 0.014 | -0.012 | 0.002 | 1.156 |
|                        | Mg37-H29 | 0.013     | 0.051          | 0.011 | -0.010 | 0.001 | 1.149 |
|                        | Mg37-H35 | 0.018     | 0.076          | 0.017 | -0.015 | 0.002 | 1.135 |
|                        | Mg37-H39 | 0.014     | 0.061          | 0.013 | -0.012 | 0.002 | 1.158 |
|                        | Mg37-H45 | 0.013     | 0.052          | 0.011 | -0.010 | 0.002 | 1.158 |
|                        | Mg37-H49 | 0.013     | 0.053          | 0.012 | -0.010 | 0.002 | 1.154 |
|                        | Mg38-H27 | 0.015     | 0.066          | 0.014 | -0.013 | 0.002 | 1.156 |
|                        | Mg38-H31 | 0.013     | 0.051          | 0.011 | -0.010 | 0.001 | 1.149 |
|                        | Mg38-H33 | 0.018     | 0.076          | 0.017 | -0.015 | 0.002 | 1.135 |
|                        | Mg38-H41 | 0.013     | 0.052          | 0.011 | -0.010 | 0.002 | 1.158 |
|                        | Mg38-H43 | 0.013     | 0.053          | 0.012 | -0.010 | 0.002 | 1.154 |
|                        | Mg38-H47 | 0.014     | 0.061          | 0.013 | -0.012 | 0.002 | 1.158 |
| <b>13ant2mg(o):12h</b> | Mg25-H29 | 0.015     | 0.063          | 0.014 | -0.012 | 0.002 | 1.158 |
|                        | Mg25-H31 | 0.013     | 0.056          | 0.012 | -0.011 | 0.002 | 1.157 |
|                        | Mg25-H37 | 0.018     | 0.076          | 0.017 | -0.015 | 0.002 | 1.135 |
|                        | Mg25-H39 | 0.013     | 0.056          | 0.012 | -0.011 | 0.002 | 1.154 |
|                        | Mg25-H45 | 0.013     | 0.054          | 0.012 | -0.010 | 0.002 | 1.150 |
|                        | Mg25-H49 | 0.015     | 0.064          | 0.014 | -0.012 | 0.002 | 1.155 |
|                        | Mg26-H27 | 0.013     | 0.056          | 0.012 | -0.011 | 0.002 | 1.157 |
|                        | Mg26-H33 | 0.018     | 0.076          | 0.017 | -0.015 | 0.002 | 1.135 |
|                        | Mg26-H35 | 0.013     | 0.056          | 0.012 | -0.011 | 0.002 | 1.157 |
|                        | Mg26-H41 | 0.015     | 0.063          | 0.014 | -0.012 | 0.002 | 1.158 |
|                        | Mg26-H43 | 0.013     | 0.054          | 0.012 | -0.010 | 0.002 | 1.150 |
|                        | Mg26-H47 | 0.013     | 0.056          | 0.012 | -0.011 | 0.002 | 1.154 |

Table S3 : AIM analysis of H<sub>2</sub> adsorbed-Li<sup>+</sup> and Mg<sup>2+</sup>-decorated phenanthrene at CAM-B3LYP conjunction with 6-311+G(d,p) basis set.

| System                | BCP      | $\rho(r)$ | $\nabla^2\rho$ | G     | V      | H     | - G/V |
|-----------------------|----------|-----------|----------------|-------|--------|-------|-------|
| <b>13phen2li(s)6H</b> | Li25-H29 | 0.011     | 0.054          | 0.011 | -0.009 | 0.002 | 1.285 |
|                       | Li25-H33 | 0.010     | 0.050          | 0.010 | -0.008 | 0.002 | 1.297 |
|                       | Li25-H37 | 0.010     | 0.051          | 0.010 | -0.008 | 0.002 | 1.297 |
|                       | Li26-H27 | 0.013     | 0.067          | 0.014 | -0.011 | 0.003 | 1.272 |
|                       | Li26-H31 | 0.013     | 0.067          | 0.014 | -0.011 | 0.003 | 1.272 |
|                       | Li26-H35 | 0.013     | 0.069          | 0.014 | -0.003 | 0.011 | 4.301 |
| <b>13phen2li(o)6h</b> | Li25-H27 | 0.012     | 0.058          | 0.012 | -0.009 | 0.003 | 1.276 |
|                       | Li25-H31 | 0.010     | 0.053          | 0.011 | -0.008 | 0.002 | 1.294 |
|                       | Li25-H35 | 0.011     | 0.055          | 0.011 | -0.009 | 0.002 | 1.286 |
|                       | Li26-H29 | 0.011     | 0.058          | 0.012 | -0.009 | 0.003 | 1.278 |
|                       | Li26-H33 | 0.011     | 0.054          | 0.011 | -0.008 | 0.002 | 1.289 |
|                       | Li26-H37 | 0.011     | 0.054          | 0.011 | -0.009 | 0.002 | 1.287 |

Table S4 : AIM analysis of H<sub>2</sub> adsorbed-Li<sup>+</sup> and Mg<sup>2+</sup>-decorated naphthacene at CAM-B3LYP method in conjunction with 6-311+G(d,p) basis set.

| System                | BCP      | $\rho(r)$ | $\nabla^2\rho$ | G     | V      | H     | - G/V |
|-----------------------|----------|-----------|----------------|-------|--------|-------|-------|
| <b>14nadc2li(s)6h</b> | Li31-H33 | 0.011     | 0.058          | 0.012 | -0.009 | 0.003 | 1.283 |
|                       | Li31-H37 | 0.011     | 0.054          | 0.011 | -0.008 | 0.002 | 1.289 |
|                       | Li31-H41 | 0.011     | 0.054          | 0.011 | -0.008 | 0.002 | 1.293 |
|                       | Li32-H35 | 0.011     | 0.058          | 0.012 | -0.009 | 0.003 | 1.283 |
|                       | Li32-H39 | 0.011     | 0.054          | 0.011 | -0.008 | 0.002 | 1.292 |
|                       | Li32-H43 | 0.011     | 0.053          | 0.011 | -0.008 | 0.002 | 1.290 |
| <b>14nadc2li(o)6h</b> | Li31-H33 | 0.011     | 0.059          | 0.012 | -0.009 | 0.003 | 1.282 |
|                       | Li31-H38 | 0.011     | 0.054          | 0.011 | -0.009 | 0.002 | 1.290 |
|                       | Li31-H41 | 0.011     | 0.054          | 0.011 | -0.009 | 0.002 | 1.288 |
|                       | Li32-H35 | 0.011     | 0.059          | 0.012 | -0.009 | 0.003 | 1.282 |
|                       | Li32-H39 | 0.011     | 0.054          | 0.011 | -0.009 | 0.002 | 1.290 |
|                       | Li32-H43 | 0.011     | 0.054          | 0.011 | -0.009 | 0.002 | 1.288 |

|                                               |          |       |       |       |        |       |       |
|-----------------------------------------------|----------|-------|-------|-------|--------|-------|-------|
| <b>14n<sub>apc</sub>2m<sub>g</sub>(s):12h</b> | Mg31-H33 | 0.015 | 0.066 | 0.014 | -0.012 | 0.002 | 1.158 |
|                                               | Mg31-H41 | 0.012 | 0.048 | 0.011 | -0.009 | 0.001 | 1.156 |
|                                               | Mg31-H43 | 0.017 | 0.075 | 0.017 | -0.015 | 0.002 | 1.140 |
|                                               | Mg31-H45 | 0.016 | 0.071 | 0.016 | -0.013 | 0.002 | 1.162 |
|                                               | Mg31-H51 | 0.012 | 0.046 | 0.010 | -0.009 | 0.001 | 1.148 |
|                                               | Mg31-H55 | 0.010 | 0.038 | 0.008 | -0.007 | 0.001 | 1.150 |
|                                               | Mg32-H35 | 0.015 | 0.064 | 0.014 | -0.012 | 0.002 | 1.157 |
|                                               | Mg32-H37 | 0.016 | 0.074 | 0.016 | -0.014 | 0.002 | 1.162 |
|                                               | Mg32-H39 | 0.008 | 0.028 | 0.006 | -0.005 | 0.001 | 1.143 |
|                                               | Mg32-H47 | 0.013 | 0.052 | 0.011 | -0.010 | 0.002 | 1.155 |
|                                               | Mg32-H49 | 0.015 | 0.064 | 0.014 | -0.012 | 0.002 | 1.157 |
|                                               | Mg32-H53 | 0.018 | 0.076 | 0.017 | -0.015 | 0.002 | 1.139 |
| <b>14n<sub>apc</sub>2m<sub>g</sub>(o):12h</b> | Mg47-H31 | 0.012 | 0.048 | 0.011 | -0.009 | 0.001 | 1.156 |
|                                               | Mg47-H33 | 0.015 | 0.066 | 0.015 | -0.013 | 0.002 | 1.157 |
|                                               | Mg47-H39 | 0.017 | 0.075 | 0.017 | -0.015 | 0.002 | 1.140 |
|                                               | Mg47-H45 | 0.012 | 0.048 | 0.011 | -0.009 | 0.001 | 1.148 |
|                                               | Mg47-H49 | 0.009 | 0.034 | 0.008 | -0.007 | 0.001 | 1.150 |
|                                               | Mg47-H53 | 0.016 | 0.073 | 0.016 | -0.014 | 0.002 | 1.162 |
|                                               | Mg48-H35 | 0.012 | 0.049 | 0.011 | -0.009 | 0.001 | 1.156 |
|                                               | Mg48-H37 | 0.012 | 0.048 | 0.011 | -0.009 | 0.001 | 1.148 |
|                                               | Mg48-H41 | 0.016 | 0.073 | 0.016 | -0.014 | 0.002 | 1.162 |
|                                               | Mg48-H43 | 0.015 | 0.066 | 0.015 | -0.013 | 0.002 | 1.157 |
|                                               | Mg48-H51 | 0.012 | 0.049 | 0.011 | -0.009 | 0.001 | 1.156 |
|                                               | Mg48-H55 | 0.009 | 0.034 | 0.007 | -0.006 | 0.001 | 1.150 |
| <b>13n<sub>apc</sub>2l<sub>i</sub>(s):4h</b>  | Li31-H33 | 0.009 | 0.044 | 0.009 | -0.007 | 0.002 | 1.332 |
|                                               | Li31-H35 | 0.009 | 0.045 | 0.009 | -0.007 | 0.002 | 1.312 |
|                                               | Li32-H37 | 0.009 | 0.045 | 0.009 | -0.007 | 0.002 | 1.315 |
|                                               | Li32-H39 | 0.009 | 0.044 | 0.009 | -0.007 | 0.002 | 1.324 |
| <b>13n<sub>apc</sub>2l<sub>i</sub>(o):4h</b>  | Li31-H37 | 0.013 | 0.065 | 0.014 | -0.011 | 0.003 | 1.263 |
|                                               | Li31-H39 | 0.013 | 0.064 | 0.013 | -0.010 | 0.003 | 1.268 |
|                                               | Li32-H33 | 0.013 | 0.064 | 0.013 | -0.011 | 0.003 | 1.262 |
|                                               | Li32-H35 | 0.013 | 0.065 | 0.013 | -0.011 | 0.003 | 1.261 |
| <b>12n<sub>apc</sub>2l<sub>i</sub>(o):4h</b>  | Li31-H33 | 0.010 | 0.047 | 0.009 | -0.007 | 0.002 | 1.301 |
|                                               | Li31-H35 | 0.010 | 0.047 | 0.009 | -0.007 | 0.002 | 1.301 |
|                                               | Li32-H37 | 0.010 | 0.046 | 0.009 | -0.007 | 0.002 | 1.304 |
|                                               | Li32-H39 | 0.009 | 0.045 | 0.009 | -0.007 | 0.002 | 1.320 |
